# Supplementary material
Source: PubMed Central journal article supplement (PMC6117364)
Supplement: 41431_2018_116_MOESM1_ESM.pdf [file 41431_2018_116_MOESM1_ESM.pdf]

Supplementary information:  
Clinical progression and metachronous paragangliomas in a large  
cohort of SDHD germline variant carriers

**Table 1**

SDHD variants as observed in the study population. All variants are considered pathogenic or likely pathogenic, except the last one (c.299C>T) which has not been described previously and classified as variant of unknown significance (VUS).

| SDHD variant                          | Number (%) | LOVD_ID <sup>2</sup> |
|---------------------------------------|------------|----------------------|
| c.274G>T p.(Asp92Tyr)                 | 177 (80%)  | SDHD_000004          |
| c.416T>C p.(Leu139Pro)                | 27 (12%)   | SDHD_000016          |
| c.284T>C p.(Leu95Pro)                 | 6 (3%)     | SDHD_000039          |
| c.-8828_169+442 del                   | 4 (2%)     | SDHD_000121          |
| c.169_169+9 del TGTATGTTCT            | 2 (1%)     | SDHD_000074          |
| c.337_340 del GACT p.(Asp113Metfs*21) | 2 (1%)     | SDHD_000022          |
| c.242C>T p.(Pro81Leu)                 | 1 (0.5%)   | SDHD_000003          |
| c.3G>C p.(Met1Ile)                    | 1 (0.5%)   | SDHD_000015          |
| c.284T>G p.(Leu95Arg)                 | 1 (0.5%)   | SDHD_000172          |
| c.299C>T p.(Thr100Ile)                | 1 (0.5%)   | SDHD_000171          |

*Note 1:* reference sequence: NT\_033899.7 NM\_003002.2

*Note 2:* data was submitted to the Leiden Open Variation Database (LOVD):

<http://databases.lovd.nl/shared/references/DOI:10.1038/s41431-018-0016-4>

**Table 2**

Multivariate recurrent event analysis predicting development of new head and neck paragangliomas.

|                                                                     | Hazard ratio (95%CI) | p-value   |
|---------------------------------------------------------------------|----------------------|-----------|
| Gender (ref = Female)                                               | 1.63 (1.10-2.40)     | p = 0.01  |
| Symptomatic versus asymptomatic<br>at baseline (ref = asymptomatic) | 1.61 (1.01-2.55)     | p = 0.04  |
| No. of head and neck<br>paragangliomas present at baseline          | 0.68 (0.56-0.82)     | p < 0.001 |
| Year follow-up started (1990-2015)                                  | 1.04 (1.00-1.08)     | p = 0.06  |

**Table 3**

Logistic regression predicting the development of new symptoms at any point between the start of follow-up and the last PGL-related visit. For 215 *SDHD* variant carriers it was known if they developed new symptoms during a median time of 8 years (IQR: 5 - 13), these patients were included in the analysis.

|                                                                     | <b>Odds ratio (95%CI)</b> | <b>p-value</b> |
|---------------------------------------------------------------------|---------------------------|----------------|
| Gender (ref = Male )                                                | 1.92 (1.06-3.53)          | p = 0.03       |
| Symptomatic versus asymptomatic at baseline<br>(ref = asymptomatic) | 1.55 (0.82-2.98)          | p = 0.18       |
| Age at the start of follow-up of follow-up <sup>1</sup>             | 0.76 (0.60-0.95)          | p = 0.02       |
| No. of HNPGs at start of follow-up                                  | 1.53 (1.13-2.10)          | p = 0.01       |
| No. of HNPGs developed during follow-up                             | 1.90 (1.26-2.99)          | p = 0.003      |
| Follow-up time                                                      | 1.03 (0.98-1.09)          | p = 0.25       |

*Note 1:* Odds ratio for a ten year increase in age.

**Table 4**

Treatment related cranial nerve paralysis/ paresis. In total, treatment for 22 (20%) carotid body tumors, 5 (28%) vagal body tumors, 7 (23%) jugulotympanic paragangliomas caused cranial nerve injury. Five vagal body tumors were treated surgically, in all cases there was postoperative vocal cord paralysis.

| <b>Nerve</b>                 | <b>Patients</b>      | <b>Carotid body tumors</b> | <b>Vagal body tumors</b> | <b>Jugulotympanic tumors<sup>1</sup></b> |
|------------------------------|----------------------|----------------------------|--------------------------|------------------------------------------|
|                              | Total<br>(Recovered) | Total<br>(Recovered)       | Total<br>(Recovered)     | Total<br>(Recovered)                     |
| NV                           | 1 ( 0 )              | 1 ( 0 )                    | 0 ( 0 )                  | 0 ( 0 )                                  |
| NVII                         | 10 ( 7 )             | 5 ( 5 )                    | 0 ( 0 )                  | 5 ( 2 )                                  |
| NVIII                        | 1 ( 0 )              | 0 ( 0 )                    | 0 ( 0 )                  | 1 ( 0 )                                  |
| NIX                          | 4 ( 2 )              | 1 ( 0 )                    | 1 ( 0 )                  | 2 ( 2 )                                  |
| NX                           | 24 ( 4 )             | 15 ( 3 )                   | 5 <sup>2</sup> ( 0 )     | 4 ( 1 )                                  |
| NXI                          | 5 ( 4 )              | 4 ( 4 )                    | 1 ( 0 )                  | 0 ( 0 )                                  |
| NXII                         | 15 ( 7 )             | 8 ( 6 )                    | 5 <sup>2</sup> ( 0 )     | 2 ( 1 )                                  |
| Cranial nerve<br>dysfunction | 33 ( 9 )             | 22 ( 7 )                   | 5 ( 0 )                  | 7 ( 1 )                                  |

*Note 1:* 6 Jugular paragangliomas, 1 tympanic and 1 jugulotympanic paraganglioma

*Note 2:* Combined surgery for a carotid and vagal body tumor in 4 cases.
